# Supplementary material for: Predictors of chronic kidney disease in type 1 diabetes: a longitudinal study from the AMD Annals initiative
Source: PubMed Central journal article supplement (PMC5468280; doi:10.1038/s41598-017-03551-w), 2017-06-12
Supplement: 41598_2017_3551_MOESM1_ESM.pdf [file 41598_2017_3551_MOESM1_ESM.pdf]

## **Supplementary Information for: Predictors of chronic kidney disease in type 1 diabetes: a longitudinal study from the AMD Annals initiative.**

Authors: Pamela Piscitelli<sup>1</sup>, Francesca Viazzi<sup>2</sup>; Paola Fioretto<sup>3</sup>, Carlo Giorda<sup>4</sup>; Antonio Ceriello<sup>5,6</sup>; Stefano Genovese<sup>6</sup>; Giuseppina Russo<sup>7</sup>; Pietro Guida<sup>8</sup>; Roberto Pontremoli<sup>2</sup> and Salvatore De Cosmo<sup>1</sup>.

<sup>1</sup>Department of Medical Sciences, Scientific Institute “Casa Sollievo della Sofferenza”, San Giovanni Rotondo (FG), Italy; <sup>2</sup>Università degli Studi and IRCCS Azienda Ospedaliera Universitaria San Martino-IST, Genova, Italy; <sup>3</sup>Department of Medicine, University of Padova, Padova, Italy. <sup>4</sup>Diabetes and Metabolism Unit ASL Turin 5, Chieri (TO), Italy; <sup>5</sup>Institut d'Investigacions Biomèdiques August Pii Sunyer (IDIBAPS) and Centro de Investigación Biomédica en Red de Diabetes y Enfermedades Metabólicas Asociadas (CIBERDEM), Barcelona, Spain; <sup>6</sup>U.O. Diabetologia e Malattie Metaboliche, Multimedica IRCCS, Sesto San Giovanni, Milano, Italy; <sup>7</sup>Department of Clinical and Experimental Medicine, University of Messina, Messina, Italy; <sup>8</sup>Associazione Medici Diabetologi, Rome, Italy.

**1. Fig. S1:** Flow diagram for selection of study patients.

**2. Fig. S2:** Figure that illustrates the hierarchical tree of glomerular filtration rate (eGFR) <60 mL/min/1.73m<sup>2</sup> risk during follow-up.

## 1-Supplemental Figure S1

5,486 patients aged  $\geq 18$  years with type 1 diabetes and 5-year renal follow-up from 137 clinics

*Patients excluded according to:*

- 552 missing data about treatment
- 1,061 patients with baseline albuminuria or  $\text{eGFR} < 60 \text{ mL/min/1.73m}^2$
- 43 with  $\text{eGFR} < 60 \text{ mL/min/1.73 m}^2$  in the previous measure if baseline  $\text{eGFR} < 90 \text{ mL/min/1.73 m}^2$
- 406 lacking a second eGFR measurement before the

- 768 excluded for missing duration of diabetes or in any baseline measurement about HbA1c, Triglycerides, HDL, LDL, or blood pressure

- 2,656 from 118 clinics constitute the study population

## 2-Supplemental Figure S2

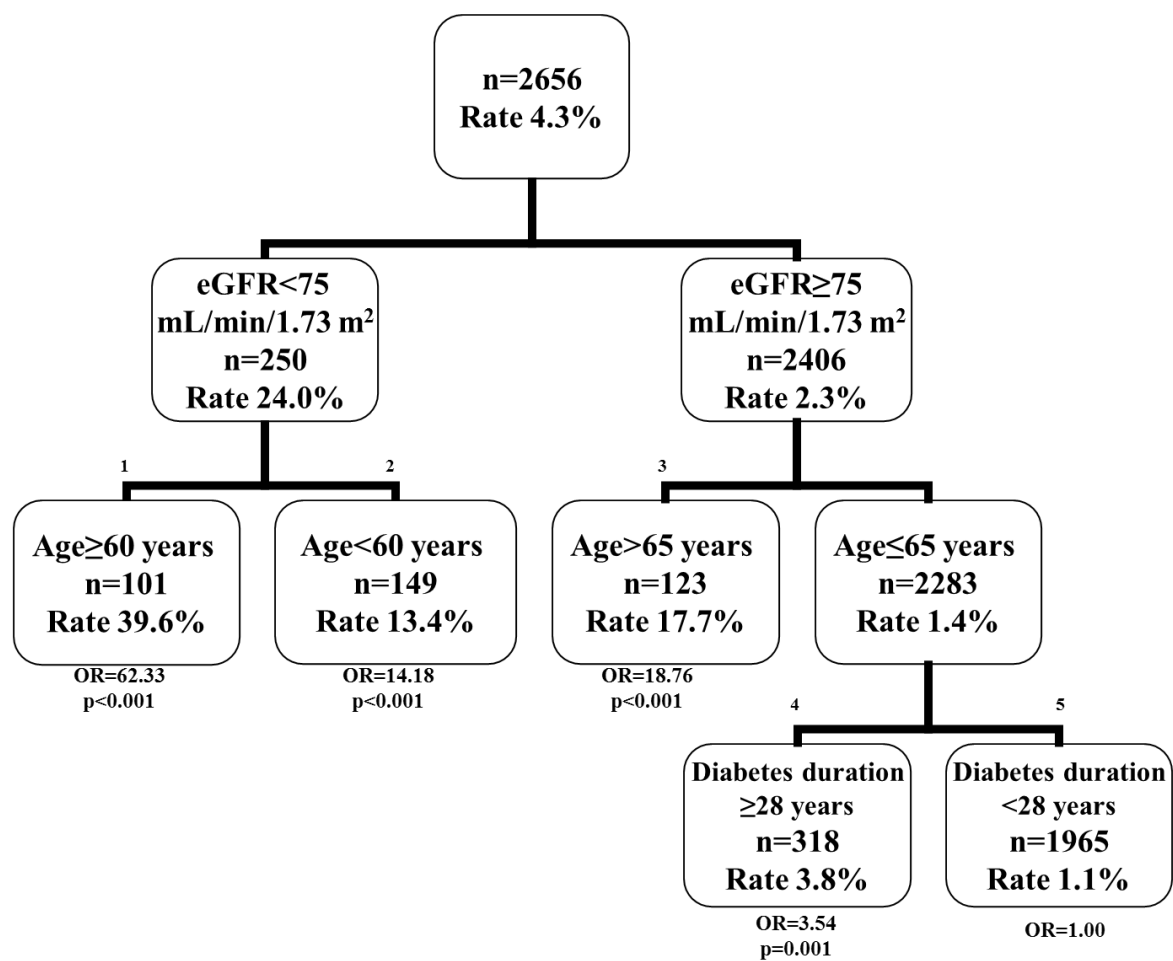

## Supplementary Tables

Supplementary Table S1 Multivariate analysis for the occurrence of 5-year renal outcome.

|                                                | CKD                     |                  | eGFR <60<br>mL/min/1.73m <sup>2</sup> |                  | Albuminuria             |                  |
|------------------------------------------------|-------------------------|------------------|---------------------------------------|------------------|-------------------------|------------------|
|                                                | Odds Ratio (95%CI)      | p                | Odds Ratio (95%CI)                    | p                | Odds Ratio (95%CI)      | p                |
| Male sex                                       | 1.07 (0.86-1.32)        | 0.560            | 0.93 (0.59-1.46)                      | 0.748            | 1.07 (0.85-1.34)        | 0.560            |
| Age (by 10 years)                              | 1.07 (0.97-1.18)        | 0.170            | <b>2.00 (1.62-2.48)</b>               | <b>&lt;0.001</b> | 0.93 (0.84-1.04)        | 0.214            |
| Known duration of diabetes (by 10 years)       | 1.09 (0.98-1.20)        | 0.099            | 0.97 (0.81-1.16)                      | 0.725            | <b>1.14 (1.02-1.27)</b> | <b>0.018</b>     |
| BMI (Kg/m <sup>2</sup> )                       |                         |                  |                                       |                  |                         |                  |
| 27-29.9                                        | 0.90 (0.66-1.22)        | 0.491            | 0.87 (0.45-1.67)                      | 0.677            | 0.94 (0.68-1.31)        | 0.737            |
| ≥30                                            | 1.11 (0.72-1.72)        | 0.630            | 1.76 (0.82-3.78)                      | 0.148            | 1.14 (0.72-1.79)        | 0.576            |
| eGFR below 90 by 10 mL/min/1.73 m <sup>2</sup> | <b>1.48 (1.27-1.73)</b> | <b>&lt;0.001</b> | <b>2.90 (2.26-3.71)</b>               | <b>&lt;0.001</b> | 1.09 (0.91-1.29)        | 0.354            |
| HbA1c ≥7%                                      | 1.04 (0.82-1.31)        | 0.765            | 0.88 (0.52-1.50)                      | 0.647            | 1.05 (0.82-1.35)        | 0.674            |
| Triglycerides ≥150 mg/dl                       | 1.44 (0.99-2.10)        | 0.056            | 0.95 (0.41-2.20)                      | 0.909            | <b>1.68 (1.15-2.47)</b> | <b>0.008</b>     |
| HDL <40M <50F mg/dL                            | 1.20 (0.85-1.68)        | 0.300            | 1.02 (0.48-2.15)                      | 0.959            | 1.15 (0.80-1.63)        | 0.453            |
| LDL ≥100 mg/dL                                 | <b>0.75 (0.60-0.93)</b> | <b>0.008</b>     | 0.77 (0.49-1.22)                      | 0.269            | <b>0.77 (0.62-0.97)</b> | <b>0.026</b>     |
| Blood Pressure ≥140/85 mmHg                    | 1.22 (0.96-1.54)        | 0.101            | 1.24 (0.78-1.97)                      | 0.368            | 1.21 (0.94-1.55)        | 0.133            |
| <i>Retinopathy</i>                             |                         |                  |                                       |                  |                         |                  |
| Non-proliferative                              | 1.18 (0.90-1.54)        | 0.228            | 1.01 (0.59-1.75)                      | 0.962            | 1.16 (0.87-1.54)        | 0.316            |
| Proliferative                                  | <b>1.66 (1.09-2.52)</b> | <b>0.017</b>     | 1.34 (0.63-2.83)                      | 0.445            | <b>1.67 (1.08-2.59)</b> | <b>0.022</b>     |
| Lipid-lowering treatment                       | 1.10 (0.83-1.47)        | 0.503            | 0.82 (0.48-1.42)                      | 0.484            | 1.24 (0.91-1.68)        | 0.172            |
| Antihypertensive treatment                     | 1.83 (0.95-3.52)        | 0.070            | 1.15 (0.35-3.78)                      | 0.824            | <b>2.20 (1.11-4.34)</b> | <b>0.024</b>     |
| Treatment with ACE-Is/ARBs                     | 0.97 (0.50-1.89)        | 0.929            | 1.33 (0.40-4.45)                      | 0.641            | 0.81 (0.41-1.62)        | 0.555            |
| Aspirin                                        | 0.84 (0.56-1.27)        | 0.409            | 0.74 (0.38-1.45)                      | 0.378            | 0.93 (0.60-1.43)        | 0.728            |
| Insulin pump                                   | 0.94 (0.60-1.48)        | 0.792            | 2.36 (0.96-5.81)                      | 0.061            | 0.74 (0.45-1.23)        | 0.244            |
| <i>Complete case analysis</i>                  |                         |                  |                                       |                  |                         |                  |
| SUA in the top gender-specific quintile        | 0.90 (0.62-1.30)        | 0.563            | 1.00 (0.49-2.04)                      | 0.995            | 0.93 (0.63-1.38)        | 0.728            |
| Smokers                                        | <b>1.75 (1.25-2.44)</b> | <b>0.001</b>     | 0.87 (0.36-2.09)                      | 0.757            | <b>1.89 (1.34-2.68)</b> | <b>&lt;0.001</b> |

See Table 1 legend for abbreviations.

**Supplementary Table S2. Baseline clinical characteristics and missing information of type 1 diabetes mellitus patients included or excluded from the study.**

|                                                     | Included<br>n=2656 | Excluded<br>n=768 | Included<br>Missing, n (%) | Excluded<br>Missing, n (%) |
|-----------------------------------------------------|--------------------|-------------------|----------------------------|----------------------------|
| Male sex                                            | 1487 (56.0%)       | 447 (58.2%)       | -                          | -                          |
| Age (years)                                         | 44±14              | 42±13             | -                          | -                          |
| Known duration of diabetes (years)                  | 17±12              | 17±11             | -                          | 64 (8.3%)                  |
| BMI (Kg/m <sup>2</sup> )                            | 24.4±3.4           | 24.7±3.5          | 131 (4.9%)                 | 398 (51.8%)                |
| Serum creatinine (mg/dL)                            | 0.84±0.16          | 0.85±0.16         | -                          | -                          |
| eGFR (mL/min/1.73 m <sup>2</sup> )                  | 99±16              | 100±16            | -                          | -                          |
| Serum uric acid (mg/dL)                             | 3.8±2.2            | 3.7±1.2           | 1192 (44.9%)               | 234 (30.5%)                |
| Serum uric acid in the top gender-specific quintile | 275 (18.8%)        | 99 (18.5%)        | -                          | -                          |
| HbA1c (%) (mmol/mol)                                | 7.7±1.3(60±9)      | 8.0±1.5(64±7)     | -                          | 26 (3.4%)                  |
| HbA1c≥7%                                            | 1843 (69.4%)       | 566 (76.3%)       | -                          | -                          |
| Total cholesterol (mg/dL)                           | 189±34             | 192±37            | 21 (0.8%)                  | 114 (14.8%)                |
| Triglycerides (mg/dL)                               | 84±56              | 86±97             | -                          | 149 (19.4%)                |
| Triglycerides ≥150 mg/dl                            | 191 (7.2%)         | 39 (6.3%)         | -                          | -                          |
| HDL (mg/dL)                                         | 62±19              | 61±16             | -                          | 143 (18.6%)                |
| HDL <40M <50F mg/dL                                 | 294 (11.1%)        | 70 (11.2%)        | -                          | -                          |
| LDL (mg/dL)                                         | 110±31             | 115±35            | -                          | 159 (20.7%)                |
| LDL ≥100 mg/dL                                      | 1650 (62.1%)       | 425 (69.8%)       | -                          | -                          |
| Systolic BP (mmHg)                                  | 125±17             | 126±17            | -                          | 595 (77.5%)                |
| Diastolic BP (mmHg)                                 | 76±9               | 77±9              | -                          | 595 (77.5%)                |
| Blood Pressure ≥140/85 mmHg                         | 779 (29.3%)        | 52 (30.1%)        | -                          | -                          |
| <i>Retinopathy</i>                                  |                    |                   |                            |                            |
| Non-proliferative                                   | 495 (18.6%)        | 171 (22.3%)       | -                          | -                          |
| Proliferative                                       | 152 (5.7%)         | 29 (3.8%)         | -                          | -                          |
| Smokers                                             | 357 (26.2%)        | 52 (25.7%)        | 1294 (48.7%)               | 566 (73.7%)                |
| Lipid-lowering treatment                            | 416 (15.7%)        | 78 (10.2%)        | -                          | -                          |
| Treatment with statins                              | 400 (15.1%)        | 72 (9.4%)         | -                          | -                          |
| Treatment with fibrates                             | 9 (0.3%)           | 4 (0.5%)          | -                          | -                          |
| Antihypertensive treatment                          | 534 (20.1%)        | 60 (7.8%)         | -                          | -                          |
| Treatment with ACE-Is/ARBs                          | 484 (18.2%)        | 54 (7.0%)         | -                          | -                          |
| Aspirin                                             | 184 (6.9%)         | 25 (3.3%)         | -                          | -                          |
| Insulin pump                                        | 162 (6.1%)         | 49 (6.4%)         | -                          | -                          |
| <i>5-year outcomes</i>                              |                    |                   |                            |                            |
| CKD                                                 | 559 (21.0%)        | 120 (15.6%)       | -                          | -                          |
| eGFR<60 mL/min/1.73 m <sup>2</sup>                  | 115 (4.3%)         | 34 (4.4%)         | -                          | -                          |
| Albuminuria                                         | 477 (18.0%)        | 93 (12.1%)        | -                          | -                          |

|                         |           |          |   |   |
|-------------------------|-----------|----------|---|---|
| eGFR<60 and albuminuria | 33 (1.2%) | 7 (0.9%) | - | - |
|-------------------------|-----------|----------|---|---|

---

See Table 1 legend for abbreviations.

**Supplementary Table S3. Baseline clinical characteristics of patients identified in nodes of hierarchical tree for glomerular filtration rate <60 mL/min/1.73 m<sup>2</sup> and for albuminuria.**

|                                         | <i>Nodes of hierarchical tree for glomerular filtration rate &lt;60 mL/min/1.73 m<sup>2</sup></i> |              |              |              |               | <i>Nodes of hierarchical tree for albuminuria</i> |              |              |              |               |
|-----------------------------------------|---------------------------------------------------------------------------------------------------|--------------|--------------|--------------|---------------|---------------------------------------------------|--------------|--------------|--------------|---------------|
|                                         | <b>1</b>                                                                                          | <b>2</b>     | <b>3</b>     | <b>4</b>     | <b>5</b>      | <b>1</b>                                          | <b>2</b>     | <b>3</b>     | <b>4</b>     | <b>5</b>      |
|                                         | <b>n=101</b>                                                                                      | <b>n=149</b> | <b>n=123</b> | <b>n=318</b> | <b>n=1965</b> | <b>n=137</b>                                      | <b>n=397</b> | <b>n=669</b> | <b>n=216</b> | <b>n=1237</b> |
| Male sex                                | 46 (45.5%)                                                                                        | 47 (31.5%)   | 68 (55.3%)   | 164 (51.6%)  | 1162 (59.1%)  | 65 (47.4%)                                        | 249 (62.7%)  | 439 (65.6%)  | 101 (46.8%)  | 633 (51.2%)   |
| Known duration of diabetes (years)      | 26±15                                                                                             | 20±12        | 26±14        | 35±6         | 12±8          | 27±14                                             | 21±12        | 15±10        | 15±10        | 15±11         |
| BMI (Kg/m <sup>2</sup> )                | 25.3±3.6                                                                                          | 24.3±3.6     | 24.7±3.4     | 24.4±3.2     | 24.3±3.4      | 26.4±4.0                                          | 25.6±3.5     | 24.8±3.5     | 24.2±3.1     | 23.5±2.9      |
| Serum creatinine (mg/dL)                | 0.99±0.13                                                                                         | 1.05±0.12    | 0.76±0.13    | 0.81±0.15    | 0.83±0.16     | 0.99±0.14                                         | 0.80±0.15    | 0.86±0.16    | 0.81±0.17    | 0.83±0.16     |
| eGFR (mL/min/1.73m <sup>2</sup> )       | 68±4                                                                                              | 69±4         | 87±7         | 96±11        | 104±14        | 71±6                                              | 99±12        | 99±16        | 101±16       | 101±16        |
| Serum uric acid (mg/dL)                 | 4.3±1.5                                                                                           | 3.9±1.2      | 3.6±1.0      | 4.0±3.3      | 3.8±2.1       | 4.4±1.3                                           | 4.1±2.7      | 4.0±2.7      | 3.4±0.9      | 3.7±1.8       |
| SUA in the top gender-specific quintile | 23 (42.6%)                                                                                        | 32 (30.5%)   | 10 (14.7%)   | 32 (20.4%)   | 178 (16.5%)   | 42 (48.8%)                                        | 41 (19.7%)   | 81 (21.1%)   | 12 (9.8%)    | 99 (14.9%)    |
| HbA1c (%)                               | 8.1±1.1                                                                                           | 7.7±1.2      | 7.9±1.1      | 7.7±1.3      | 7.6±1.4       | 8.1±1.2                                           | 7.7±1.2      | 7.8±1.4      | 9.7±1.0      | 7.1±0.9       |
| HbA1c (mmol/mol)                        | (65±11)                                                                                           | (60±10)      | (86±11)      | (60±9)       | (59±8)        | (65±10)                                           | (60±10)      | (61±8)       | (82±12)      | (54±13)       |
| HbA1c≥7%                                | 87 (86.1%)                                                                                        | 107 (71.8%)  | 101 (82.1%)  | 234 (73.6%)  | 1314 (66.9%)  | 116 (84.7%)                                       | 305 (76.8%)  | 497 (74.3%)  | 216 (100.0%) | 709 (57.3%)   |
| Total cholesterol (mg/dL)               | 194±37                                                                                            | 196±35       | 192±31       | 195±30       | 187±35        | 192±34                                            | 191±34       | 200±38       | 187±31       | 183±31        |
| Triglycerides (mg/dL)                   | 96±42                                                                                             | 86±46        | 79±29        | 78±37        | 85±61         | 92±42                                             | 91±68        | 133±73       | 61±13        | 59±14         |
| Triglycerides ≥150 mg/dl                | 12 (11.9%)                                                                                        | 11 (7.4%)    | 4 (3.3%)     | 14 (4.4%)    | 150 (7.6%)    | 12 (8.8%)                                         | 36 (9.1%)    | 143 (21.4%)  | 0 (0.0%)     | 0 (0.0%)      |
| HDL (mg/dL)                             | 65±21                                                                                             | 64±17        | 67±21        | 66±19        | 61±18         | 63±19                                             | 60±20        | 57±19        | 67±18        | 65±18         |
| HDL <40M <50F mg/dL                     | 10 (9.9%)                                                                                         | 17 (11.4%)   | 12 (9.8%)    | 24 (7.5%)    | 231 (11.8%)   | 13 (9.5%)                                         | 58 (14.6%)   | 115 (17.2%)  | 15 (6.9%)    | 93 (7.5%)     |
| LDL (mg/dL)                             | 111±36                                                                                            | 114±31       | 108±28       | 114±28       | 109±31        | 111±30                                            | 113±31       | 117±34       | 108±29       | 106±28        |
| LDL ≥100 mg/dL                          | 58 (57.4%)                                                                                        | 104 (69.8%)  | 75 (61.0%)   | 223 (70.1%)  | 1190 (60.6%)  | 89 (65.0%)                                        | 261 (65.7%)  | 473 (70.7%)  | 131 (60.6%)  | 696 (56.3%)   |
| Systolic BP (mmHg)                      | 141±17                                                                                            | 128±16       | 140±17       | 130±18       | 123±16        | 138±16                                            | 134±17       | 125±16       | 124±16       | 122±16        |
| Diastolic BP (mmHg)                     | 77±9                                                                                              | 76±9         | 77±10        | 75±9         | 76±9          | 77±9                                              | 79±10        | 76±9         | 76±9         | 74±8          |
| Blood Pressure ≥140/85 mmHg             | 64 (63.4%)                                                                                        | 52 (34.9%)   | 73 (59.3%)   | 120 (37.7%)  | 470 (23.9%)   | 80 (58.4%)                                        | 193 (48.6%)  | 189 (28.3%)  | 61 (28.2%)   | 256 (20.7%)   |
| Non-proliferative retinopathy           | 22 (21.8%)                                                                                        | 32 (21.5%)   | 36 (29.3%)   | 100 (31.4%)  | 305 (15.5%)   | 45 (32.8%)                                        | 101 (25.4%)  | 112 (16.7%)  | 44 (20.4%)   | 193 (15.6%)   |
| Proliferative retinopathy               | 11 (10.9%)                                                                                        | 12 (8.1%)    | 20 (16.3%)   | 47 (14.8%)   | 62 (3.2%)     | 14 (10.2%)                                        | 41 (10.3%)   | 39 (5.8%)    | 13 (6.0%)    | 45 (3.6%)     |
| Smokers                                 | 5 (9.4%)                                                                                          | 11 (15.5%)   | 10 (16.7%)   | 38 (25.9%)   | 293 (28.4%)   | 7 (10.1%)                                         | 52 (24.6%)   | 127 (37.1%)  | 23 (22.3%)   | 148 (23.2%)   |
| Lipid-lowering treatment                | 31 (30.7%)                                                                                        | 29 (19.5%)   | 46 (37.4%)   | 70 (22.0%)   | 240 (12.2%)   | 60 (43.8%)                                        | 147 (37.0%)  | 92 (13.8%)   | 14 (6.5%)    | 103 (8.3%)    |
| Treatment with statins                  | 29 (28.7%)                                                                                        | 29 (19.5%)   | 45 (36.6%)   | 66 (20.8%)   | 231 (11.8%)   | 57 (41.6%)                                        | 142 (35.8%)  | 85 (12.7%)   | 14 (6.5%)    | 102 (8.2%)    |
| Treatment with fibrates                 | 0 (0.0%)                                                                                          | 0 (0.0%)     | 0 (0.0%)     | 2 (0.6%)     | 7 (0.4%)      | 2 (1.5%)                                          | 0 (0.0%)     | 6 (0.9%)     | 0 (0.0%)     | 1 (0.1%)      |
| Antihypertensive treatment              | 53 (52.5%)                                                                                        | 39 (26.2%)   | 68 (55.3%)   | 104 (32.7%)  | 270 (13.7%)   | 137 (100.0%)                                      | 397 (100.0%) | 0 (0.0%)     | 0 (0.0%)     | 0 (0.0%)      |
| Treatment with ACE-Is/ARBs              | 50 (49.5%)                                                                                        | 35 (23.5%)   | 60 (48.8%)   | 94 (29.6%)   | 245 (12.5%)   | 124 (90.5%)                                       | 360 (90.7%)  | 0 (0.0%)     | 0 (0.0%)     | 0 (0.0%)      |
| Aspirin                                 | 24 (23.8%)                                                                                        | 12 (8.1%)    | 32 (26.0%)   | 43 (13.5%)   | 73 (3.7%)     | 44 (32.1%)                                        | 79 (19.9%)   | 21 (3.1%)    | 3 (1.4%)     | 37 (3.0%)     |
| Insulin pump                            | 2 (2.0%)                                                                                          | 11 (7.4%)    | 0 (0.0%)     | 22 (6.9%)    | 127 (6.5%)    | 6 (4.4%)                                          | 26 (6.5%)    | 30 (4.5%)    | 14 (6.5%)    | 86 (7.0%)     |

*5-year outcomes*

|                         |            |            |            |            |             |            |             |             |            |             |
|-------------------------|------------|------------|------------|------------|-------------|------------|-------------|-------------|------------|-------------|
| CKD                     | 58 (57.4%) | 45 (30.2%) | 46 (37.4%) | 76 (23.9%) | 334 (17.0%) | 70 (51.1%) | 107 (27.0%) | 155 (23.2%) | 43 (19.9%) | 184 (14.9%) |
| eGFR<60 mL/min/1.73     |            |            |            |            |             |            |             |             |            |             |
| m2                      | 40 (39.6%) | 20 (13.4%) | 21 (17.1%) | 12 (3.8%)  | 22 (1.1%)   | 38 (27.7%) | 16 (4.0%)   | 26 (3.9%)   | 4 (1.9%)   | 31 (2.5%)   |
| Albuminuria             | 32 (31.7%) | 31 (20.8%) | 31 (25.2%) | 67 (21.1%) | 316 (16.1%) | 48 (35.0%) | 96 (24.2%)  | 137 (20.5%) | 39 (18.1%) | 157 (12.7%) |
| eGFR<60 and albuminuria | 14 (13.9%) | 6 (4.0%)   | 6 (4.9%)   | 3 (0.9%)   | 4 (0.2%)    | 16 (11.7%) | 5 (1.3%)    | 8 (1.2%)    | 0 (0.0%)   | 4 (0.3%)    |

See Table 1 legend for abbreviations. Nodes are those identified in Supplemental Figure 2 and 3.
